# Supplementary material for: miR-27-3p inhibition restore fibroblasts viability in diabetic wound by targeting NOVA1
Source: publisher site journal article supplement (doi:10.18632/aging.103266), 2020-06-26
Supplement: Supplementary file [file aging-v12i13-103266-supplementary-material-SD1.pdf]

## SUPPLEMENTARY TABLE

**Supplementary Table 1. The clinical information of patients.**

| <b>Number</b> | <b>Sex</b> | <b>Age</b> | <b>Wound site</b> | <b>Healthy status</b> |
|---------------|------------|------------|-------------------|-----------------------|
| 1             | Male       | 76         | Left foot         | Healthy               |
| 2             | Female     | 53         | Left foot         | Healthy               |
| 3             | Female     | 64         | Right foot        | Healthy               |
| 4             | Male       | 68         | Left foot         | Healthy               |
| 5             | Female     | 72         | Right foot        | Healthy               |
| 6             | Female     | 54         | Right foot        | Diabetes              |
| 7             | Female     | 59         | Right foot        | Diabetes              |
| 8             | Male       | 62         | Left foot         | Diabetes              |
| 9             | Male       | 60         | Right foot        | Diabetes              |
| 10            | Female     | 68         | Left foot         | Diabetes              |
